# Supplementary material
Source: PubMed Central journal article supplement (PMC2955780)

**Supplemental Figure S1: Percent penetrance of copy number aberrations in**

**SCC cases.** The diagram depicts cumulative frequency (penetrance) of amplifications (red, signal shift to the right) and deletions (green, signal shift to the left) across all examined SCC samples. The amplitude of change along each chromosome indicates the fraction of samples containing copy number change at a give point in the genome (quantified by thin vertical lines indicating the percent value).

# Percent Penetrance of Copy Number Aberrations in SCC Cases

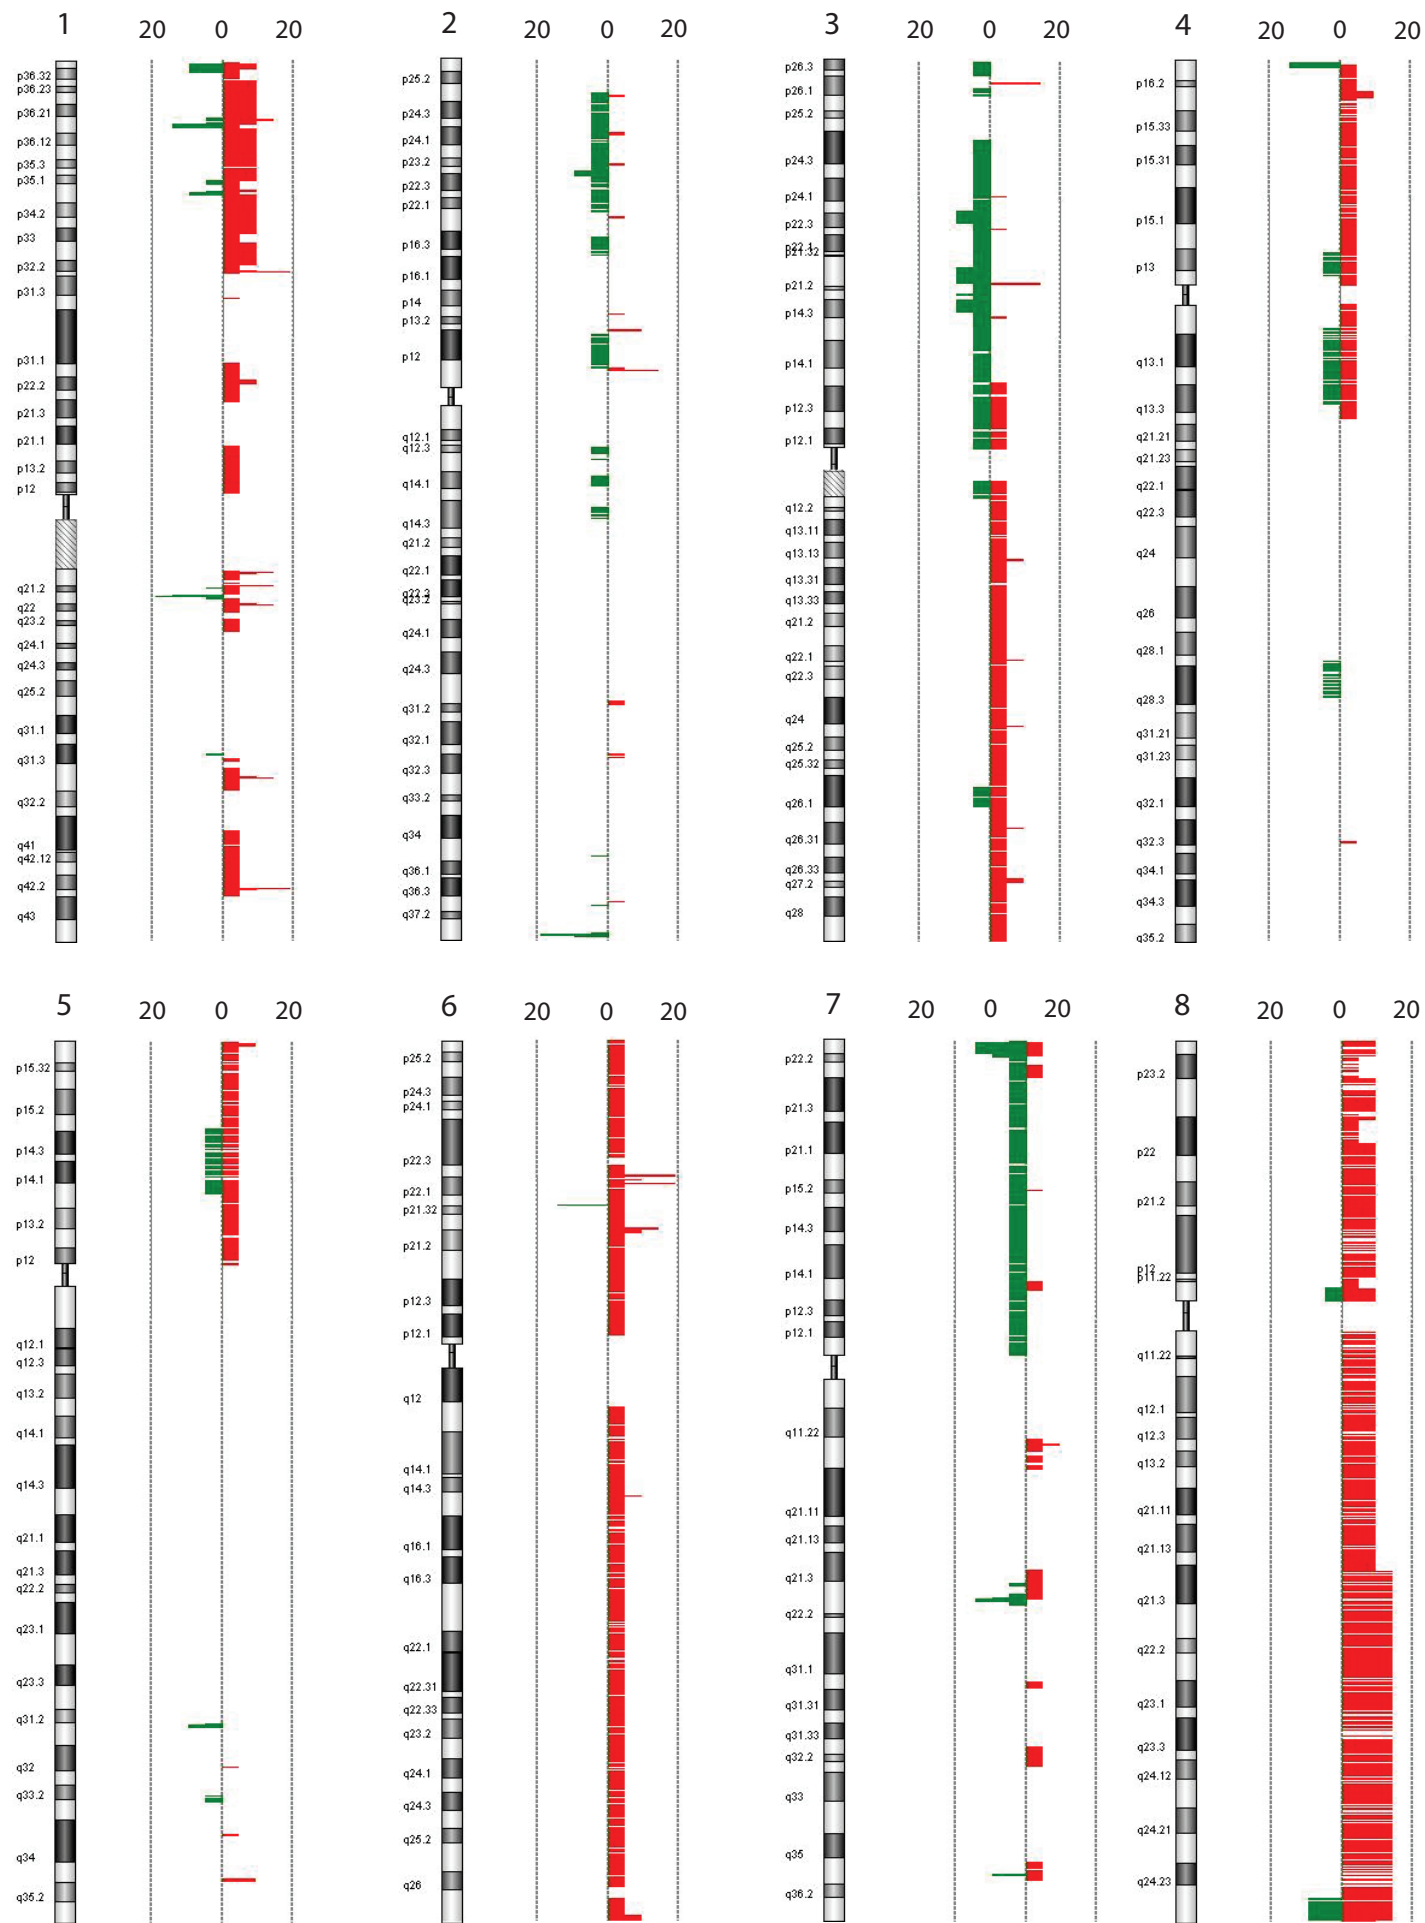

Percentages of samples showing gain (red) or loss (green) in gene copy relative to diploid are shown for 19 SCC and 2 SCCIS cases.

# Percent Penetrance of Copy Number Aberrations in SCC Cases

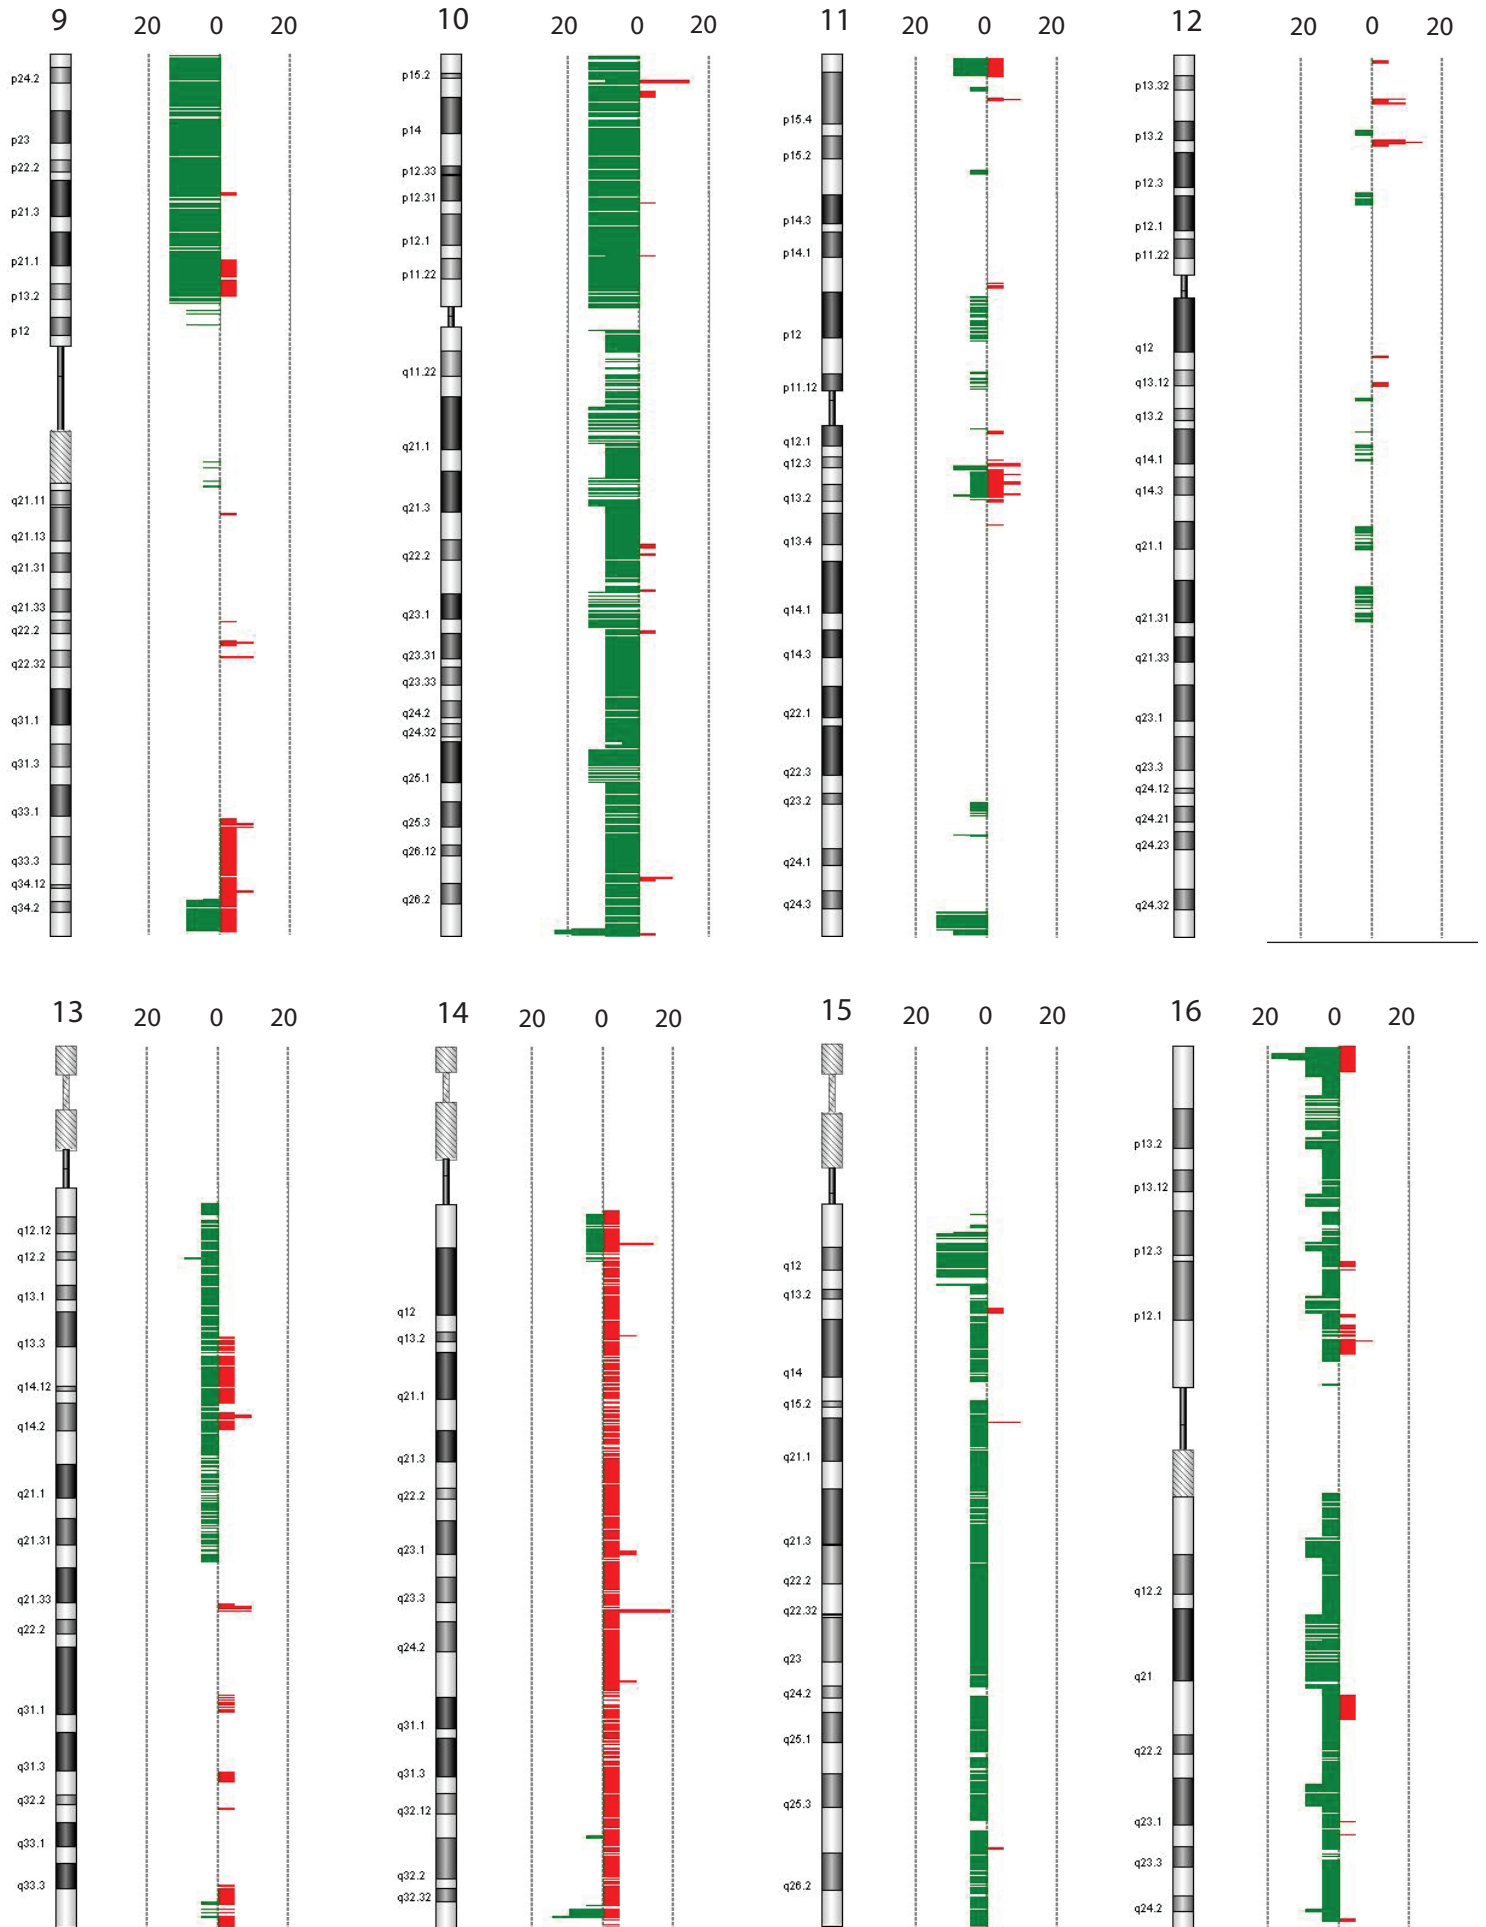

# Percent Penetrance of Copy Number Aberrations in SCC Cases

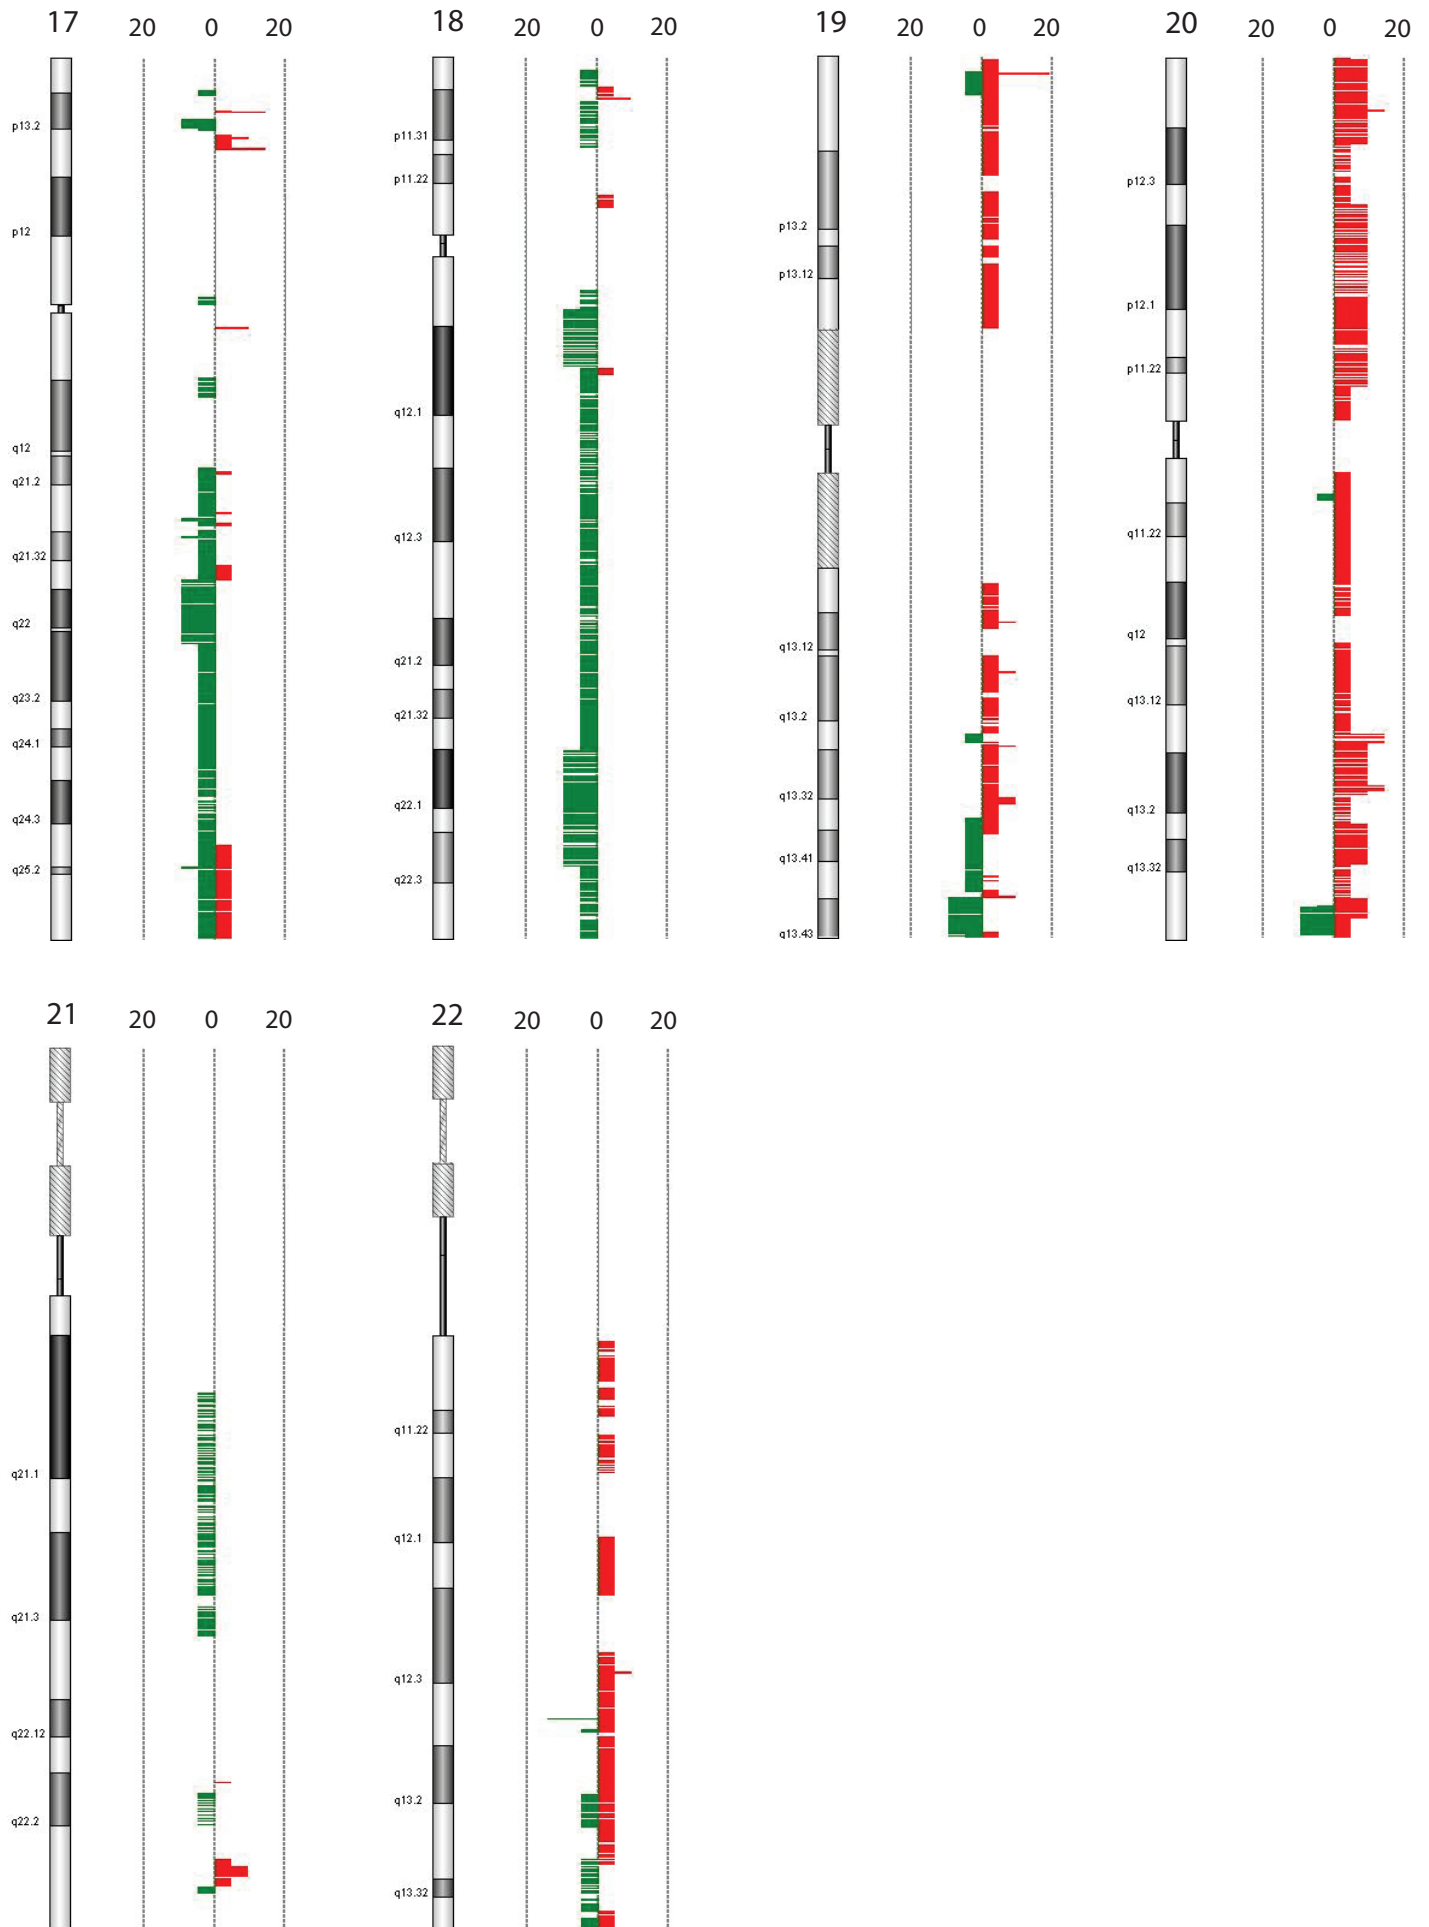

Supplement: NIHMS220670-supplement-1.pdf [file NIHMS220670-supplement-1.pdf]
